# Supplementary material for: Feasibility of AI-assisted compressed sensing protocols in knee MR imaging: a prospective multi-reader study
Source: Springer Nature journal article supplement (doi:10.1007/s00330-023-09823-6), 2023-06-29
Supplement: MOESM1 [file 25552370]

# Supplementary

## ACS image reconstruction

The architecture of the convolutional neural networks used for image reconstruction in this study was extended with paired undersampled and full-sampled images. The network used in this study is similar to U-net, with a residual block consisting of two convolution operations and a jump connection replacing the convolution operation in the original U-net. To speed up the learning process, a long jump connection was added to learn the residuals between fully sampled and undersampled images. To further improve the quality of the reconstructed images, a least-squares generative adversarial network training technique was used [1; 2]. In previous studies, we applied this technology in single-breath-hold T2WI liver MRI [3], and the same network structure of the deep learning-based fast MRI reconstruction framework was used in this study.

### Reference:

- 1 Quan TM, Nguyen-Duc T, Jeong WK (2018) Compressed Sensing MRI Reconstruction Using a Generative Adversarial Network With a Cyclic Loss. *IEEE Trans Med Imaging* 37:1488-1497
- 2 Yang G, Yu S, Dong H et al (2018) DAGAN: Deep De-Aliasing Generative Adversarial Networks for Fast Compressed Sensing MRI Reconstruction. *IEEE Trans Med Imaging* 37:1310-1321
- 3 Sheng RF, Zheng LY, Jin KP et al (2021) Single-breath-hold T2WI liver MRI with deep learning-based reconstruction: A clinical feasibility study in comparison to conventional multi-breath-hold T2WI liver MRI. *Magn Reson Imaging* 81:75-81

Table S1. MRI sequence parameters used in three protocols

| Protocol<br><br>Parameter       | PI protocol        |                    |                   |                      | ACS-3.5min protocol |                    |                   |                      | ACS-2min protocol  |                    |                   |                      |
|---------------------------------|--------------------|--------------------|-------------------|----------------------|---------------------|--------------------|-------------------|----------------------|--------------------|--------------------|-------------------|----------------------|
|                                 | Sagittal<br>T1 FSE | Sagittal<br>PD FSE | Coronal<br>PD FSE | Transverse<br>PD FSE | Sagittal<br>T1 FSE  | Sagittal<br>PD FSE | Coronal<br>PD FSE | Transverse<br>PD FSE | Sagittal<br>T1 FSE | Sagittal<br>PD FSE | Coronal<br>PD FSE | Transverse<br>PD FSE |
| Repetition time, ms             | 600                | 2600               | 2600              | 2600                 | 600                 | 2750               | 2400              | 2400                 | 400                | 2450               | 1900              | 2600                 |
| Echo time, ms                   | 8.9                | 37.3               | 37.3              | 37.3                 | 8.5                 | 40.0               | 37.3              | 37.3                 | 6.2                | 50.3               | 43.0              | 46.6                 |
| Echo train length               | 3                  | 6                  | 6                 | 6                    | 4                   | 10                 | 7                 | 7                    | 5                  | 12                 | 10                | 11                   |
| No. excitations                 | 1                  | 1                  | 1                 | 1.5                  | 1                   | 1                  | 1                 | 1                    | 1                  | 1                  | 1                 | 1                    |
| Bend width,Hz                   | 250                | 180                | 180               | 180                  | 220                 | 245                | 185               | 185                  | 400                | 220                | 300               | 250                  |
| Flip angle, degrees             | 90                 | 90                 | 90                | 90                   | 90                  | 90                 | 90                | 90                   | 90                 | 90                 | 90                | 90                   |
| Field of view, mm               | 160×160            | 160×160            | 160×160           | 160×160              | 160×160             | 160×160            | 160×160           | 160×160              | 160×160            | 160×160            | 160×160           | 160×160              |
| Matrix                          | 252×336            | 272×320            | 272×320           | 272×320              | 252×336             | 272×320            | 272×320           | 272×320              | 252×336            | 272×320            | 272×320           | 272×320              |
| Slice thickness/gap, mm         | 3.5/0.5            | 3.5/0.5            | 3.5/0.5           | 4.0/0.5              | 3.5/0.5             | 3.5/0.5            | 3.5/0.5           | 4.0/0.5              | 4.0/0.5            | 4.0/0.5            | 4.0/0.5           | 4.0/0.5              |
| Concatenation                   | 3                  | 1                  | 1                 | 1                    | 2                   | 1                  | 1                 | 1                    | 2                  | 1                  | 1                 | 1                    |
| Acceleration factor             | 2                  | 2                  | 2                 | 2                    | 2                   | 2                  | 4                 | 4                    | 3                  | 1                  | 1                 | 2                    |
| Mean acquisition time,<br>min:s | 1:39               | 1:54               | 1:24              | 1:45                 | 0:35                | 0:58               | 0:34              | 0:46                 | 0:23               | 0:40               | 0:30              | 0:24                 |

Note: Multiple values indicate parameter differences between scan sequences. Sagittal, coronal, and axial T2 fat-suppression sequences and T1WI sagittal scan parameters of each scanning protocol, respectively.

Table S2. Quantitative evaluation of edge rise distance (ERD) and signal-to-noise ratio (SNR) in sagittal T1WI images

| Variable and protocol |            | Mean  | Median | SD   | IQR   | <i>P</i> value for Friedman test | <i>P</i> value for post hoc analysis after Friedman test |            |          |
|-----------------------|------------|-------|--------|------|-------|----------------------------------|----------------------------------------------------------|------------|----------|
|                       |            |       |        |      |       |                                  | PI                                                       | ACS-3.5min | ACS-2min |
| ERD                   |            |       |        |      |       |                                  |                                                          |            |          |
|                       | PI         | 1.03  | 0.93   | 0.41 | 0.33  | -                                | <.001                                                    | 0.676      |          |
|                       | ACS-3.5min | 0.80  | 0.76   | 0.22 | 0.24  | <.001                            | <.001                                                    | -          | <.001    |
|                       | ACS-2min   | 1.16  | 0.90   | 0.73 | 0.57  |                                  | 0.676                                                    | <.001      | -        |
| SNR-Bone              |            |       |        |      |       |                                  |                                                          |            |          |
|                       | PI         | 21.05 | 21.71  | 6.0  | 10.53 | -                                | <.001                                                    | <.001      | <.001    |
|                       | ACS-3.5min | 23.42 | 23.88  | 6.1  | 10.74 | <.001                            | <.001                                                    | -          | 0.149    |
|                       | ACS-2min   | 23.70 | 24.13  | 6.35 | 10.54 |                                  | <.001                                                    | 0.149      | -        |
| SNR-IPFP              |            |       |        |      |       |                                  |                                                          |            |          |
|                       | PI         | 8.05  | 7.93   | 1.21 | 1.79  | <.001                            | -                                                        | <.001      | <.001    |
|                       | ACS-3.5min | 8.94  | 8.81   | 1.47 | 2.2   |                                  | <.001                                                    | -          | <.001    |
|                       | ACS-2min   | 7.08  | 7.09   | 1.43 | 2.18  |                                  | <.001                                                    | <.001      | -        |

Note. SD: standard deviation; IQR: interquartile range; PI: parallel acquisition technique; ACS: AI-assisted compressed sensing; ERD: edge rise distance; SNR: signal-to-noise ratio.

Table S3. Quantitative evaluation of edge rise distance (ERD) and signal-to-noise ratio (SNR) in sagittal PDFS images

| Variable and protocol |            | Mean  | Median | SD   | IQR  | <i>P</i> value for Friedman test | <i>P</i> value for post hoc analysis after Friedman test |            |          |
|-----------------------|------------|-------|--------|------|------|----------------------------------|----------------------------------------------------------|------------|----------|
|                       |            |       |        |      |      |                                  | PI                                                       | ACS-3.5min | ACS-2min |
| ERD                   |            |       |        |      |      |                                  |                                                          |            |          |
|                       | PI         | 0.85  | 0.77   | 0.25 | 0.25 |                                  | -                                                        | NA         | NA       |
|                       | ACS-3.5min | 1.09  | 0.74   | 0.86 | 0.59 | 0.218                            | NA                                                       | -          | NA       |
|                       | ACS-2min   | 0.83  | 0.78   | 0.24 | 0.23 |                                  | NA                                                       | NA         | -        |
| SNR-Bone              |            |       |        |      |      |                                  |                                                          |            |          |
|                       | PI         | 8.67  | 8.67   | 1.35 | 2.43 | <.001                            | -                                                        | <.001      | <.001    |
|                       | ACS-3.5min | 11.17 | 11.3   | 1.62 | 2.29 |                                  | <.001                                                    | -          | <.001    |
|                       | ACS-2min   | 15.25 | 15.25  | 2.04 | 2.87 |                                  | <.001                                                    | <.001      | -        |
| SNR-IPFP              |            |       |        |      |      |                                  |                                                          |            |          |
|                       | PI         | 5.65  | 5.48   | 1.10 | 1.83 | <.001                            | -                                                        | <.001      | <.001    |
|                       | ACS-3.5min | 7.67  | 7.57   | 1.39 | 1.92 |                                  | <.001                                                    | -          | <.001    |
|                       | ACS-2min   | 6.39  | 6.28   | 1.11 | 1.91 |                                  | <.001                                                    | <.001      | -        |

Note. PDFS: proton density-weighted fat suppression images; SD: standard deviation; IQR: interquartile range; PI: parallel acquisition technique; ACS: AI-assisted compressed sensing; ERD: edge rise distance; SNR: signal-to-noise ratio.

Table S4. Quantitative evaluation of edge rise distance (ERD) and signal-to-noise ratio (SNR) in transverse PDFS images

| Variable and protocol |            | Mean  | Median | SD   | IQR  | <i>P</i> value for Friedman test | <i>P</i> value for post hoc analysis after Friedman test |            |          |
|-----------------------|------------|-------|--------|------|------|----------------------------------|----------------------------------------------------------|------------|----------|
|                       |            |       |        |      |      |                                  | PI                                                       | ACS-3.5min | ACS-2min |
| ERD                   |            |       |        |      |      |                                  |                                                          |            |          |
|                       | PI         | 0.91  | 0.79   | 0.33 | 0.32 | -                                | <.001                                                    | <.001      |          |
|                       | ACS-3.5min | 0.70  | 0.68   | 0.16 | 0.19 | <.001                            | <.001                                                    | -          | 0.085    |
|                       | ACS-2min   | 0.75  | 0.72   | 0.17 | 0.22 |                                  | <.001                                                    | 0.085      | -        |
| SNR-Bone              |            |       |        |      |      |                                  |                                                          |            |          |
|                       | PI         | 8.24  | 8.2    | 0.98 | 1.71 | -                                | <.001                                                    | <.001      |          |
|                       | ACS-3.5min | 9.98  | 9.96   | 1.19 | 1.97 | <.001                            | <.001                                                    | -          | 1.000    |
|                       | ACS-2min   | 9.88  | 9.35   | 1.25 | 1.89 |                                  | <.001                                                    | 1.000      | -        |
| SNR-IPFP              |            |       |        |      |      |                                  |                                                          |            |          |
|                       | PI         | 8.61  | 8.58   | 1.85 | 2.68 | <.001                            | -                                                        | <.001      | <.001    |
|                       | ACS-3.5min | 10.24 | 10.21  | 2.37 | 3.52 |                                  | <.001                                                    | -          | <.001    |
|                       | ACS-2min   | 10.47 | 10.51  | 2.32 | 3.64 |                                  | <.001                                                    | <.001      | -        |

Note. PDFS: proton density-weighted fat suppression images; SD: standard deviation; IQR: interquartile range; PI: parallel acquisition technique; ACS: AI-assisted compressed sensing; ERD: edge rise distance; SNR: signal-to-noise ratio.

Table S5. Quantitative evaluation of edge rise distance (ERD) and signal-to-noise ratio (SNR) in coronal PDFS images

| Variable and protocol |            | Mean  | Median | SD   | IQR  | <i>P</i> value for Friedman test | <i>P</i> value for post hoc analysis after Friedman test |            |          |
|-----------------------|------------|-------|--------|------|------|----------------------------------|----------------------------------------------------------|------------|----------|
|                       |            |       |        |      |      |                                  | PI                                                       | ACS-3.5min | ACS-2min |
| ERD                   |            |       |        |      |      |                                  |                                                          |            |          |
|                       | PI         | 1.09  | 0.90   | 0.52 | 0.72 | 0.002                            | -                                                        | 0.004      | 1.000    |
|                       | ACS-3.5min | 0.94  | 0.82   | 0.43 | 0.41 |                                  | 0.004                                                    | -          | 0.014    |
|                       | ACS-2min   | 0.96  | 0.78   | 0.22 | 0.46 |                                  | 1.000                                                    | 0.014      | -        |
| SNR-Bone              |            |       |        |      |      |                                  |                                                          |            |          |
|                       | PI         | 8.45  | 8.47   | 0.88 | 1.51 | <.001                            | -                                                        | <.001      | <.001    |
|                       | ACS-3.5min | 9.74  | 9.73   | 1.00 | 1.50 |                                  | <.001                                                    | -          | <.001    |
|                       | ACS-2min   | 11.62 | 11.72  | 1.13 | 1.61 |                                  | <.001                                                    | <.001      | -        |
| SNR-IPFP              |            |       |        |      |      |                                  |                                                          |            |          |
|                       | PI         | 6.42  | 4.44   | 2.10 | 4.05 | <.001                            | -                                                        | <.001      | <.001    |
|                       | ACS-3.5min | 8.52  | 8.63   | 2.30 | 3.28 |                                  | <.001                                                    | -          | <.001    |
|                       | ACS-2min   | 11.21 | 10.90  | 3.11 | 4.62 |                                  | <.001                                                    | <.001      | -        |

Note. PDFS: proton density-weighted fat suppression images; SD: standard deviation; IQR: interquartile range; PI: parallel acquisition technique; ACS: AI-assisted compressed sensing; ERD: edge rise distance; SNR: signal-to-noise ratio.
